# Supplementary material for: The prevalence of glucose-6-phosphate dehydrogenase deficiency in the Cape Verdean population in the context of malaria elimination
Source: PubMed Central journal article supplement (PMC7075545; doi:10.1371/journal.pone.0229574), 2020-03-16
Supplement: pone.0229574.s002.pdf [file pone.0229574.s002.pdf]

| Code   | Municipality | Island   | Sex    | Age | TDR Carestart Results | Quantification of G6PDd IU/ gHb | Values Enzyme G6PDd (IU/ gHb) |
|--------|--------------|----------|--------|-----|-----------------------|---------------------------------|-------------------------------|
| PR109  | Praia        | Santiago | Male   | 56  | Positive              | Intermediate                    | 7,3                           |
| PR152  | Praia        | Santiago | Male   | 13  | Positive              | Intermediate                    | 6,5                           |
| PR159  | Praia        | Santiago | Male   | 28  | Positive              | Deficient                       | 1,7                           |
| PR175  | Praia        | Santiago | Male   | 36  | Positive              | Intermediate                    | 6,9                           |
| PR178  | Praia        | Santiago | Female | 35  | Positive              | Normal                          | 59,9                          |
| PR182  | Praia        | Santiago | Male   | 43  | Positive              | Intermediate                    | 6,2                           |
| PR183  | Praia        | Santiago | Female | 39  | Positive              | Normal                          | 40,3                          |
| PR301  | Praia        | Santiago | Female | 56  | Positive              | Intermediate                    | 3,2                           |
| PR385  | Praia        | Santiago | Female | 27  | Positive              | Intermediate                    | 2,8                           |
| PR398  | Praia        | Santiago | Female | 24  | Positive              | Deficient                       | 1,5                           |
| PR415  | Praia        | Santiago | Female | 42  | Positive              | Normal                          | 18,3                          |
| PR442  | Praia        | Santiago | Male   | 13  | Positive              | Intermediate                    | 3,2                           |
| PR444  | Praia        | Santiago | Female | 43  | Positive              | Intermediate                    | 7,1                           |
| PR495  | Praia        | Santiago | Female | 70  | Positive              | Deficient                       | 0,6                           |
| PR675  | Praia        | Santiago | Male   | 12  | Positive              | Deficient                       | 1,1                           |
| PR681  | Praia        | Santiago | Male   | 27  | Positive              | Deficient                       | 0,9                           |
| PR703  | Praia        | Santiago | Male   | 44  | Positive              | Intermediate                    | 2,8                           |
| PR719  | Praia        | Santiago | Female | 73  | Positive              | Normal                          | 85,1                          |
| PR723  | Praia        | Santiago | Female | 10  | Positive              | Normal                          | 72,8                          |
| PR750  | Praia        | Santiago | Male   | 44  | Positive              | Normal                          | 106,6                         |
| PR755  | Praia        | Santiago | Female | 19  | Positive              | Normal                          | 142                           |
| PR842  | Praia        | Santiago | Male   | 75  | Positive              | Normal                          | 8,8                           |
| PR894  | Praia        | Santiago | Male   | 5   | Positive              | Intermediate                    | 5                             |
| PR902  | Praia        | Santiago | Male   | 30  | Positive              | Intermediate                    | 3,2                           |
| PR923  | Praia        | Santiago | Male   | 42  | Positive              | Intermediate                    | 5,8                           |
| PR927  | Praia        | Santiago | Male   | 25  | Positive              | Normal                          | 14                            |
| PR1199 | Praia        | Santiago | Male   | 30  | Positive              | Deficient                       | 0,6                           |
| PR1268 | Praia        | Santiago | Male   | 13  | Positive              | Normal                          | 119,6                         |
| PR1332 | Praia        | Santiago | Female | 33  | Positive              | Normal                          | 81,6                          |
| PR1380 | Praia        | Santiago | Female | 67  | Positive              | Normal                          | 138,5                         |
| PR1395 | Praia        | Santiago | Female | 33  | Positive              | Normal                          | 12,3                          |
| PR1537 | Praia        | Santiago | Female | 28  | Positive              | Normal                          | 66,1                          |
| PR1541 | Praia        | Santiago | Female | 61  | Positive              | Normal                          | 86                            |
| PR1573 | Praia        | Santiago | Female | 23  | Positive              | Intermediate                    | 6,2                           |
| PR1619 | Praia        | Santiago | Male   | 26  | Positive              | Intermediate                    | 6,2                           |
| PR1621 | Praia        | Santiago | Male   | 29  | Positive              | Normal                          | 13,1                          |
| PR1636 | Praia        | Santiago | Female | 62  | Positive              | Intermediate                    | 5,4                           |
| PR1639 | Praia        | Santiago | Male   | 53  | Positive              | Deficient                       | 1,9                           |
| PR1789 | Praia        | Santiago | Male   | 53  | Positive              | Intermediate                    | 5,4                           |
| PR1791 | Praia        | Santiago | Female | 31  | Positive              | Deficient                       | 1,5                           |

|              |             |             |        |    |          |              |       |
|--------------|-------------|-------------|--------|----|----------|--------------|-------|
| <b>SV032</b> | São Vicente | São Vicente | Female | 51 | Positive | Normal       | 128,2 |
| <b>SV051</b> | São Vicente | São Vicente | Female | 39 | Positive | Deficient    | 1,5   |
| <b>SV159</b> | São Vicente | São Vicente | Male   | 46 | Positive | Deficient    | 1,5   |
| <b>SV183</b> | São Vicente | São Vicente | Male   | 38 | Positive | Deficient    | 0,6   |
| <b>SV189</b> | São Vicente | São Vicente | Female | 59 | Positive | Normal       | 9,7   |
| <b>SV192</b> | São Vicente | São Vicente | Female | 14 | Positive | Deficient    | 1,1   |
| <b>SV193</b> | São Vicente | São Vicente | Female | 52 | Positive | Normal       | 12,3  |
| <b>SV288</b> | São Vicente | São Vicente | Male   | 48 | Positive | Deficient    | 0,2   |
| <b>SV308</b> | São Vicente | São Vicente | Male   | 33 | Positive | Intermediate | 5     |
| <b>SV324</b> | São Vicente | São Vicente | Male   | 76 | Positive | Intermediate | 3,2   |
| <b>SV328</b> | São Vicente | São Vicente | Male   | 55 | Positive | Deficient    | 1,5   |
| <b>SV337</b> | São Vicente | São Vicente | Male   | 74 | Positive | Deficient    | 0,2   |
| <b>SV352</b> | São Vicente | São Vicente | Male   | 64 | Positive | Intermediate | 5     |
| <b>SV367</b> | São Vicente | São Vicente | Female | 74 | Positive | Intermediate | 7,5   |
| <b>SV408</b> | São Vicente | São Vicente | Male   | 55 | Positive | Deficient    | 0,2   |
| <b>SV409</b> | São Vicente | São Vicente | Female | 51 | Positive | Intermediate | 5,8   |
| <b>SV438</b> | São Vicente | São Vicente | Female | 38 | Positive | Intermediate | 5,4   |
| <b>SV514</b> | São Vicente | São Vicente | Female | 35 | Positive | Intermediate | 5,4   |
| <b>SV544</b> | São Vicente | São Vicente | Male   | 46 | Positive | Deficient    | 1,9   |
| <b>SV737</b> | São Vicente | São Vicente | Male   | 17 | Positive | Deficient    | 0,2   |
| <b>SV819</b> | São Vicente | São Vicente | Female | 29 | Positive | Deficient    | 2,4   |
| <b>SV851</b> | São Vicente | São Vicente | Female | 28 | Positive | Deficient    | 1,5   |
| <b>SV871</b> | São Vicente | São Vicente | Male   | 53 | Positive | Deficient    | 1,9   |

|               |                |             |        |    |          |              |       |
|---------------|----------------|-------------|--------|----|----------|--------------|-------|
| <b>SV936</b>  | São Vicente    | São Vicente | Male   | 8  | Positive | Deficient    | 2,4   |
| <b>SV954</b>  | São Vicente    | São Vicente | Male   | 46 | Positive | Intermediate | 4,1   |
| <b>SV969</b>  | São Vicente    | São Vicente | Male   | 47 | Positive | Deficient    | 1,5   |
| <b>SCZ009</b> | Santa Cruz     | Santiago    | Male   | 16 | Positive | Normal       | 9,3   |
| <b>SCZ208</b> | Santa Cruz     | Santiago    | Female | 46 | Positive | Intermediate | 2,8   |
| <b>SC019</b>  | Santa Catarina | Santiago    | Male   | 20 | Positive | Deficient    | 2,2   |
| <b>SC086</b>  | Santa Catarina | Santiago    | Male   | 17 | Positive | Intermediate | 4,7   |
| <b>SC150</b>  | Santa Catarina | Santiago    | Female | 39 | Positive | Normal       | 143,5 |
| <b>SC247</b>  | Santa Catarina | Santiago    | Male   | 12 | Positive | Normal       | 10,1  |
| <b>SC248</b>  | Santa Catarina | Santiago    | Male   | 12 | Positive | Deficient    | 1,5   |
| <b>SC251</b>  | Santa Catarina | Santiago    | Female | 13 | Positive | Normal       | 24,3  |
| <b>SC254</b>  | Santa Catarina | Santiago    | Female | 37 | Positive | Normal       | 41,1  |
| <b>SC282</b>  | Santa Catarina | Santiago    | Male   | 23 | Positive | Intermediate | 7,1   |
| <b>SC490</b>  | Santa Catarina | Santiago    | Male   | 12 | Positive | Intermediate | 6,2   |
| <b>FG001</b>  | São Felipe     | Fogo        | Female | 30 | Positive | Normal       | 8,6   |
| <b>FG040</b>  | São Felipe     | Fogo        | Male   | 53 | Positive | Intermediate | 4,5   |
| <b>FG041</b>  | São Felipe     | Fogo        | Male   | 54 | Positive | Intermediate | 3,9   |
| <b>FG106</b>  | São Felipe     | Fogo        | Male   | 38 | Positive | Normal       | 137,4 |
| <b>FG110</b>  | São Felipe     | Fogo        | Female | 20 | Positive | Normal       | 40,9  |
| <b>FG115</b>  | São Felipe     | Fogo        | Female | 60 | Positive | Normal       | 429,5 |
| <b>FG117</b>  | São Felipe     | Fogo        | Male   | 28 | Positive | Normal       | 11,6  |
| <b>FG120</b>  | São Felipe     | Fogo        | Female | 8  | Positive | Normal       | 22,2  |
| <b>FG123</b>  | São Felipe     | Fogo        | Male   | 5  | Positive | Normal       | 9,5   |
| <b>FG151</b>  | São Felipe     | Fogo        | Female | 37 | Positive | Intermediate | 4,6   |
| <b>FG262</b>  | São Felipe     | Fogo        | Female | 8  | Positive | Normal       | 22,2  |
| <b>FG264</b>  | São Felipe     | Fogo        | Male   | 4  | Positive | Deficient    | 2,4   |
| <b>FG276</b>  | São Felipe     | Fogo        | Female | 13 | Positive | Normal       | 77,8  |
| <b>FG336</b>  | São Felipe     | Fogo        | Female | 66 | Positive | Intermediate | 3,2   |
| <b>FG341</b>  | São Felipe     | Fogo        | Male   | 13 | Positive | Intermediate | 5,8   |
| <b>FG346</b>  | São Felipe     | Fogo        | Female | 22 | Positive | Intermediate | 6,7   |
| <b>FG380</b>  | São Felipe     | Fogo        | Female | 49 | Positive | Intermediate | 2,8   |
| <b>FG383</b>  | São Felipe     | Fogo        | Female | 35 | Positive | Normal       | 51,1  |
| <b>FG396</b>  | São Felipe     | Fogo        | Female | 30 | Positive | Normal       | 110,1 |

|              |            |          |        |    |          |              |      |
|--------------|------------|----------|--------|----|----------|--------------|------|
| <b>FG415</b> | São Felipe | Fogo     | Female | 37 | Positive | Intermediate | 7,5  |
| <b>FG425</b> | São Felipe | Fogo     | Male   | 35 | Positive | Deficient    | 0,6  |
| <b>FG430</b> | São Felipe | Fogo     | Female | 33 | Positive | Normal       | 13,6 |
| <b>FG440</b> | São Felipe | Fogo     | Female | 42 | Positive | Normal       | 23   |
| <b>FG442</b> | São Felipe | Fogo     | Female | 52 | Positive | Normal       | 12,3 |
| <b>FG444</b> | São Felipe | Fogo     | Male   | 65 | Positive | Deficient    | 1,1  |
| <b>FG502</b> | São Felipe | Fogo     | Male   | 34 | Positive | Deficient    | 1,5  |
| <b>FG528</b> | São Felipe | Fogo     | Male   | 22 | Positive | Intermediate | 2,8  |
| <b>FG541</b> | São Felipe | Fogo     | Female | 56 | Positive | Normal       | 14,9 |
| <b>FG542</b> | São Felipe | Fogo     | Female | 56 | Positive | Normal       | 10,1 |
| <b>FG548</b> | São Felipe | Fogo     | Male   | 32 | Positive | Intermediate | 3,7  |
| <b>FG560</b> | São Felipe | Fogo     | Male   | 56 | Positive | Intermediate | 3,7  |
| <b>T090</b>  | Tarrafal   | Santiago | Female | 32 | Positive | Normal       | 50   |
| <b>T152</b>  | Tarrafal   | Santiago | Female | 78 | Positive | Intermediate | 4,1  |
| <b>T176</b>  | Tarrafal   | Santiago | Female | 54 | Positive | Intermediate | 4,5  |
| <b>SM012</b> | São Miguel | Santiago | Male   | 42 | Positive | Intermediate | 4,7  |
| <b>SM071</b> | São Miguel | Santiago | Male   | 15 | Positive | Intermediate | 5,6  |
| <b>SM073</b> | São Miguel | Santiago | Male   | 32 | Positive | Normal       | 14,2 |
| <b>SM147</b> | São Miguel | Santiago | Female | 17 | Positive | Normal       | 79,1 |
| <b>SM160</b> | São Miguel | Santiago | Female | 17 | Positive | Normal       | 36,8 |
| <b>SM164</b> | São Miguel | Santiago | Female | 32 | Positive | Intermediate | 3,7  |
| <b>SM172</b> | São Miguel | Santiago | Female | 40 | Positive | Normal       | 25,6 |
| <b>SM216</b> | São Miguel | Santiago | Female | 27 | Positive | Normal       | 19,6 |
